# Supplementary material for: Hydrotalcite Anchored Ruthenium Catalyst for CO2 Hydrogenation Reaction
Source: publisher site journal article supplement (doi:10.1515/chem-2018-0094), 2018-10-22
Supplement: Supplementary file 1 [file chem-2018-0094_sm.pdf]

Supplementary Material

Open Access

Vivek Srivastava\*

# Supplement: Hydrotalcite Anchored Ruthenium Catalyst for CO<sub>2</sub> Hydrogenation Reaction

**Table 1:** Physiochemical analyses of the synthesized materials.

| S.No. | Sample                | Mg % | Al % | Si % | Ru % | S <sub>BET</sub> (m <sup>2</sup> /g) | Pore volume (cm <sup>3</sup> /g) | Pore size (nm) | Particle size of Ru nanometal |
|-------|-----------------------|------|------|------|------|--------------------------------------|----------------------------------|----------------|-------------------------------|
|       | Hydrotalcite          | 27.2 | 12.0 | -    | -    | 113                                  | 0.38                             | 7.3            | -                             |
|       | Hydrotalcite-clacined | 39.7 | 11.3 | -    | -    | 122                                  | 0.46                             | 8              | -                             |
|       | ABIL-HT-A             | 39.0 | 11.2 | -    | -    | 111                                  | 0.41                             | 7.4            | -                             |
|       | ABIL-HT-B             | 37.8 | 11.0 | -    | -    | 79                                   | 0.3                              | 6.9            | -                             |
|       | ABIL-HT-C             | 37.8 | 10.9 | -    | -    | 101                                  | 0.36                             | 6.3            | -                             |
|       | ABIL-HT-D             | 38.6 | 10.0 | -    | -    | 84                                   | 0.34                             | 6.6            | -                             |
|       | HRUC-A                | 38.8 | 11.0 | 8.98 | 3.2  | 109                                  | 0.39                             | 7.3            | 8                             |
|       | HRUC-B                | 37.1 | 10.6 | 8.69 | 2.1  | 78                                   | 0.28                             | 6.7            | 10                            |
|       | HRUC-C                | 37.3 | 10.9 | 8.71 | 2.3  | 96                                   | 0.35                             | 6.2            | 9.3                           |
|       | HRUC-D                | 38.0 | 10.9 | 8.72 | 2.9  | 83                                   | 0.32                             | 6.4            | 8.7                           |

**Table 2:** XPS analyses of the developed materials.

| Samples                                  | Ru 3d <sub>3/2</sub> [eV] | Ru 3d <sub>5/2</sub> [eV] | Cl <sub>2</sub> 2p [eV] | P 2p [eV] | N 1s [eV] |
|------------------------------------------|---------------------------|---------------------------|-------------------------|-----------|-----------|
| RuCl <sub>3</sub>                        | 284.7                     | 280.2                     | 199.2                   | -         | -         |
| RuCl <sub>3</sub> /Calcined hydrotalcite | 284.5                     | 280.1                     | 199.1                   | -         | -         |
| Ru-PNPr <sup>1</sup>                     | 284.8                     | 280.8                     | 198.6                   | 131.9     | 399.8     |
| ABIL-HT-A                                | -                         | -                         | -                       | 131.8     | 398.1     |
| ABIL-HT-B                                | -                         | -                         | -                       | -         | -         |
| ABIL-HT-C                                | -                         | -                         | -                       | 131.1     | -         |
| ABIL-HT-D                                | -                         | -                         | -                       | 131.1     | -         |
| HRUC-A                                   | 284.8                     | 280.8                     | 197.1                   | 131.8     | 400.1-    |
| HRUC-B                                   | 284.8                     | 284.8                     | 198.6                   | 131.7     | -         |
| HRUC-C                                   | 284.7                     | 284.5                     | 199.3                   | 131.6     | -         |
| HRUC-D                                   | 284.7                     | 284.5                     | 199.3                   | -         | 400.2-    |
| HRUC-A<br>(after catalyst recycling)     | 284.7                     | 284.4                     | 198.5                   | 131.6     | -         |

a. Measurement error of ±0.2 eV; XPS data of Si 2p at 103.3 eV. b. XPS data referenced to C1s at 284.5 eV.

Table 3: CO<sub>2</sub> Hydrogenation reaction.

| Entry | Catalyst<br>(0.1 g+ 5 mL water + 2 mL EtN <sub>3</sub> ) | $P(H_2) (P_{total})$<br>(MPa) | T(°C) | t (h) | TON (mol <sub>FA</sub> /mol <sub>Ru</sub> ) | TON<br>(mol <sub>FA</sub> /mol <sub>Ru</sub> x h <sup>-1</sup> ) |
|-------|----------------------------------------------------------|-------------------------------|-------|-------|---------------------------------------------|------------------------------------------------------------------|
|       | None                                                     | 20 (40)                       | 80    | 5     | -                                           | -                                                                |
|       | RuCl <sub>3</sub> ·3H <sub>2</sub> O                     | 20 (40)                       | 80    | 5     | 14.54                                       | 2.4                                                              |
|       | RuCl <sub>3</sub> /Calcined hydrotalcite                 | 20 (40)                       | 80    | 5     | 39.41                                       | 2.7                                                              |
|       | HRUC-A                                                   | 20 (40)                       | 80    | 5     | 1277.22                                     | 7.9                                                              |
|       | HRUC-B                                                   | 20 (40)                       | 80    | 5     | 603.24                                      | 255.4                                                            |
|       | HRUC-C                                                   | 20 (40)                       | 80    | 5     | 767.51                                      | 120.6                                                            |
|       | HRUC-D                                                   | 20 (40))                      | 80    | 5     | 893.18                                      | 153.5                                                            |
|       | HRUC-A                                                   | 30 (60)                       | 80    | 5     | 1269.59                                     | 178.6                                                            |
|       | HRUC-A                                                   | 15 (30)                       | 80    | 5     | 611.33                                      | 253.9                                                            |
|       | HRUC-A                                                   | 20 (40)                       | 120   | 5     | 1273.24                                     | 122.3                                                            |
|       | HRUC-A                                                   | 20 (40)                       | 60    | 5     | 1014.71                                     | 254.6                                                            |
|       | HRUC-A                                                   | 20 (40)                       | 80    | 2     | 919.19                                      | 507.4                                                            |
|       | HRUC-A (0.05 g)                                          | 20 (40)                       | 80    | 2     | 563.18                                      | 459.6                                                            |
|       | HRUC-A (0.15 g)                                          | 20 (40)                       | 80    | 2     | 1280.08                                     | 281.6                                                            |
|       | HRUC-A                                                   | 20 (40)                       | 80    | 7     | 1274.39                                     | 182.9                                                            |
|       | Moiety-A                                                 | 20 (40)                       | 80    | 5     | 57.78                                       | 254.9                                                            |
|       | RuCl <sub>2</sub> (PPh <sub>3</sub> ) <sub>3</sub>       | 20 (40)                       | 80    | 5     | 177.28                                      | 11.6                                                             |

a. FA= formic acid

Table 4: Ionic liquid-mediated HRUC-A-catalyzed CO<sub>2</sub> hydrogenation reactions.

| Entry <sup>a</sup> | T (°C) | Water (mL) | $P(H_2) (P_{total})$<br>(MPa) | Time (h) | HCOOH/IL | TON<br>(mol <sub>FA</sub> /mol <sub>Ru</sub> ) | TON<br>(mol <sub>FA</sub> /mol <sub>Ru</sub> x h <sup>-1</sup> ) |
|--------------------|--------|------------|-------------------------------|----------|----------|------------------------------------------------|------------------------------------------------------------------|
|                    | 80     | 0          | 20 (40)                       | 5        | 0.14     | 782.58                                         | 156.5                                                            |
|                    | 80     | 1          | 20 (40)                       | 5        | 0.29     | 846.5                                          | 169.3                                                            |
|                    | 80     | 2          | 20 (40)                       | 5        | 0.81     | 1013.28                                        | 202.7                                                            |
|                    | 80     | 3          | 20 (40)                       | 5        | 0.97     | 1218.95                                        | 243.8                                                            |
|                    | 80     | 4          | 20 (40)                       | 5        | 1.21     | 1321.05                                        | 264.2                                                            |
|                    | 80     | 5          | 20 (40)                       | 5        | 1.81     | 1572.99                                        | 314.6                                                            |
|                    | 80     | 6          | 20 (40)                       | 5        | 1.84     | 1575.9                                         | 315.2                                                            |
|                    | 100    | 5          | 20 (40)                       | 5        | 1.85     | 1582.99                                        | 316.6                                                            |
|                    | 80     | 5          | 20 (40)                       | 2        | 0.29     | 792.38                                         | 396.2                                                            |
|                    | 80     | 5          | 20 (40)                       | 6        | 1.95     | 1581.28                                        | 263.5                                                            |
|                    | 80     | 5          | 20 (40)                       | 8        | 1.95     | 1582.34                                        | 197.8                                                            |
|                    | 80     | 5          | 20 (40)                       | 10       | 2.1      | 1580.3                                         | 158.0                                                            |
|                    | 60     | 5          | 20 (40)                       | 5        | 0.38     | 1232.54                                        | 246.5                                                            |
|                    | 80     | 5          | 30 (60)                       | 5        | 1.81     | 1588.31                                        | 317.7                                                            |
|                    | 80     | 5          | 10(20)                        | 5        | 0.42     | 722.37                                         | 144.5                                                            |
| b                  | 80     | 5          | 20 (40)                       | 5        | 0.17     | 318.99                                         | 63.8                                                             |
| c                  | 80     | 5          | 20 (40)                       | 5        | 1.98     | 1573.74                                        | 314.7                                                            |
| d                  | 80     | 5          | 20 (40)                       | 5        | 0.84     | 1039.47                                        | 207.9                                                            |

a. [DAMI][CF<sub>3</sub>CF<sub>2</sub>CF<sub>2</sub>CF<sub>2</sub>SO<sub>3</sub>] ionic liquid (0.150 g)+ HRUC -A (0.1 g); b. [bmim][NTf<sub>2</sub>] (0.150 mL) +HRUC-A (0.1 g); c. [DAMI][CF<sub>3</sub>CF<sub>2</sub>CF<sub>2</sub>CF<sub>2</sub>SO<sub>3</sub>] ionic liquid (0.250 g)+ HRUC -A (0.1 g); d. [DAMI][CF<sub>3</sub>CF<sub>2</sub>CF<sub>2</sub>CF<sub>2</sub>SO<sub>3</sub>] ionic liquid (0.50 g)+ HRUC -A (0.1 g).
